# Supplementary material for: Endoglin Expression on Cancer-Associated Fibroblasts Regulates Invasion and Stimulates Colorectal Cancer Metastasis
Source: Oxford University Press journal article supplement (doi:10.1158/1078-0432.ccr-18-0329), 2018-06-26
Supplement: 10780432ccr180329-sup-196204_2_supp_4824513_pb9qhh.docx [file 10780432ccr180329-sup-196204_2_supp_4824513_pb9qhh.docx]

| **Gene** | **Forward (5’-3’)** | **Reverse (5’-3’)** |
| --- | --- | --- |
| Human GAPDH | TGCACCACCAACTGCTTAGC | GGCATGGACTGTGGTCATGAG |
| Human endoglin | CCGAGAGGTGCTTCTGGTCC | GTGCAGTGGGATTCCCAGG |
| Human TGF-β type II receptor | TTCAGAAGTCGGATGTGGAAATG | GTTGTAAGTGACTATCATGTCGT |
| Human BMP type II receptor | AACTGTTGGAGCTGATTGGC | CGGTTTGCAAAGGAAAACAC |
| Human ALK-1 | ATGACCTCCCGCAACTCGAT | TAGAGGGAGCCGTGCTCGT |
| Human ALK-2 | TGCCTTCGAATAGTGCTGTC | CATCAAGCTGATTGGTGCTC |
| Human ALK-3 | GGGGTCCGGACTTATGAAA | TACGACTCCTCCAAGATGTGG |
| Human ALK-4 | GCTCGAAGATGCAATTCTGG | TTGGCATACCAACACTCTCG |
| Human ALK-5 | ACGGCGTTACAGTGTTTCTG | GCACATACAAACGGCCTATCT |
| Human activin type IIA receptor | GCATCACAAGATGGCCTACC | CCAGGCAAACTGTAGACTTC |
| Human activin type IIB receptor | ATGTGGACATCCATGAGGAC | TGAAGATCTCCCGTTCACTC |
| Human PDGF receptor β | TGCCTCCGACGAGATCTATG | GGGTGGTCACTCCTCAGAAA |
| Human PDGF receptor α | CTGGACACTGGGAGATTCGG | CCGCAATGAATGTCCCACAC |
| Human αSMA | CCGGGAGAAAATGACTCAAA | GAAGGAATAGCCACGCTCAG |
| Human collagen-I | CAGCGCCTTCACCTACAGC | TTTGTATTCAATCACTGTCTTGCC |
| Human PAI-1 | GCCAACAAGAGCCAATCACA | AGGCAAGCAAGGGCTGAAG |
| Human ID-1 | CTGCTCTACGACATGAACGG | GAAGGTCCCTGATGTAGTCGAT |
| Mouse GAPDH | ATCACTGCCACCCAGAAGAC | ATGAGGTCCACCACCCTGTT |
| Mouse endoglin | TGAATGGCAACCACGAGC | GCAGGATGAGAATGGCGTC |
| Mouse TGF-β type II receptor | GGGCATCGCTCATCTCCAC | TCCCTGTGAACAATGGGCAT |
| Mouse BMP receptor II | CCACAACCCAGTATGCCAATG | TGGGACCTATGTGCCACTATGTT |
| Mouse ALK-3 | TACCAGACGGTGTTAATGCG | TGGCACATTTCAGGAAGTCA |
| Mouse ALK-5 | GCCATAACCGCACTGTC | ATGGGCAATAGCTGGTTTT |
| Mouse αSMA | GTCCCAGACATCAGGGAGTAA | TCGGATACTTCAGCGTCAGGA |

**Supplementary table S3** qPCR primer sequences
