# Supplementary material for: Endoglin Expression on Cancer-Associated Fibroblasts Regulates Invasion and Stimulates Colorectal Cancer Metastasis
Source: Oxford University Press journal article supplement (doi:10.1158/1078-0432.ccr-18-0329), 2018-06-26
Supplement: 10780432ccr180329-sup-196204_2_supp_4824521_px9qhx.docx [file 10780432ccr180329-sup-196204_2_supp_4824521_px9qhx.docx]

| **Antibody** | **Manufacturer** | **Cat #** | **Clone** | **Dilution** |
| --- | --- | --- | --- | --- |
| CD31 | Santa Cruz Biotechnologies | sc-1506-R | M-20 | 1:800 |
| Endoglin | R&D Systems | BAF1097 | Goat polyclonal | 1:100 |
| Pan-cytokeratin | Dako | M3515 | AE1/AE3 | 1:400 |
| αSMA | Progen | 61001 | ASM-1 | 1:800 |
| Vimentin | Cell Signaling Technologies | 5741 | D21H3 | 1:400 |
| pSmad1 | Cell Signaling Technologies | 9511 | D5B10 | 1:1000 |
| pSmad2 | Cell Signaling Technologies | 8828 | 138D4 | 1:1000 |
| GAPDH | Millipore | CB1001 | 6C5 | 1:5000 |
| Actin | Sigma Aldrich | A2228 | AC-74 | 1:5000 |

**Supplementary table S2** Antibodies for immunohistochemistry, immunofluorescence and western blot.
