# Supplementary material for: Endoglin Expression on Cancer-Associated Fibroblasts Regulates Invasion and Stimulates Colorectal Cancer Metastasis
Source: Oxford University Press journal article supplement (doi:10.1158/1078-0432.ccr-18-0329), 2018-06-26
Supplement: 10780432ccr180329-sup-196204_2_supp_4824523_p69qh6.docx [file 10780432ccr180329-sup-196204_2_supp_4824523_p69qh6.docx]

| **Gene** | **NF #1** | **CAF #1** | **NF #2** | **CAF #2** | **NF #3** | **CAF #3** | **NF #4** | **CAF #4** |
| --- | --- | --- | --- | --- | --- | --- | --- | --- |
| αSMA | 0.0913 (0.0067) | 0.1510 (0.0287) | 0.0146 (0.0028) | 0.3463 (0.0134) | 0.1042 (0.0124) | 1.1845 (0.1841) | 0.1009 (0.0063) | 0.1402 (0.0222) |
| Collagen-1 | 2.2736 (0.2236) | 0.3393 (0.0273) | 5.4986 (0.3609) | 9.8159 (1.3329) | 3.5143 (0.4399) | 2.7854 (0.4624) | 4.2795 (0.8024) | 0.5435 (0.1287) |
| Endoglin | 0.0499 (0.0105) | 0.0215 (0.0047) | 0.1481 (0.0354) | 0.1293 (0.0093) | 0.0670 (0.0099) | 0.0607 (0.0125) | 0.0978 (0.0161) | 0.0318 (0.0069) |
| TGF-βRII | 0.0027 (0.0003) | 0.0008 (0.0003) | 0.0041 (0.0009) | 0.0024 (0.0006) | 0.0037 (0.0003) | 0.0022 (0.0005) | 0.0021 (0.0005) | 0.0018 (0.0003) |
| BMPRII | 0.0214 (0.0040) | 0.0119 (0.0004) | 0.0231 (0.0012) | 0.0320 (0.0024) | 0.0582 (0.0045) | 0.0258 (0.0032) | 0.0220 (0.0035) | 0.0219 (0.0045) |
| ALK-1 | 0.0010 (0.0004) | 0.0002 (0.0000) | 0.0008 (0.0001) | 0.0030 (0.0002) | 0.0020 (0.0007) | 0.0012 (0.0001) | 0.0045 (0.0004) | 0.0016 (0.0002) |
| ALK-2 | 0.0108 (0.0019) | 0.0064 (0.0021) | 0.0177 (0.0041) | 0.0101 (0.0018) | 0.0192 (0.0032) | 0.0102 (0.0027) | 0.0091 (0.0011) | 0.0074 (0.0013) |
| ALK-3 | 0.0298 (0.0101) | 0.0093 (0.0031) | 0.0168 (0.0031) | 0.0222 (0.0019) | 0.0623 (0.0154) | 0.0304 (0.0062) | 0.0129 (0.0046) | 0.0121 (0.0016) |
| ALK-4 | 0.0032 (0.0016) | 0.0021 (0.0003) | 0.0019 (0.0002) | 0.0035 (0.0008) | 0.0018 (0.0001) | 0.0020 (0.0003) | 0.0024 (0.0016) | 0.0019 (0.0006) |
| ALK-5 | 0.0129 (0.0033) | 0.0147 (0.0005) | 0.0119 (0.0022) | 0.0232 (0.0018) | 0.0535 (0.0094) | 0.0205 (0.0024) | 0.0048 (0.0022) | 0.0068 (0.0004) |
| ACTRIIA | 0.0033 (0.0003) | 0.0007 (0.0003) | 0.0025 (0.0005) | 0.0041 (0.0010) | 0.0035 (0.0004) | 0.0033 (0.0008) | 0.0038 (0.0003) | 0.0014 (0.0007) |
| ACTRIIB | 0.0005 (0.0002) | 0.0002 (0.0001) | 0.0002 (0.0000) | 0.0001 (0.0001) | 0.0005 (0.0003) | 0.0009 (0.0001) | 0.0004 (0.0001) | 0.0005 (0.0003) |
| PDGFR-α | 0.0015 (0.0011) | 0.0001 (0.0001) | 0.0029 (0.0002) | 0.0014 (0.0003) | 0.0018 (0.0003) | 0.0011 (0.0002) | 0.0006 (0.0003) | 0.0004 (0.0002) |
| PDGFR-β | 0.0578 (0.0102) | 0.0196 (0.0018) | 0.1209 (0.0222) | 0.1413 (0.0152) | 0.068 (0.0107) | 0.1717 (0.0054) | 0.1176 (0.0064) | 0.0611 (0.0022) |

**Supplementary table S4** Characterization of patient-derived NFs and CAFs

RNA expression of TGF-β, BMP and PDGF receptors and characteristic fibroblast markers was determined in patient-derived sets of NFs and CAFs of four CRC patients. Values shown are relative to GAPDH expression (Mean (SD)), calculated according to Livak and Schmittgen, *Methods*, 2001. TGF-βRII, TGF-β receptor type II; BMPRII, BMP receptor type II; ACTRIIA, activin receptor type IIA; ACTRIIB, activin receptor type IIB.
